# Supplementary material for: Mass Gathering Nursing in Action: Nurses’ Lived Experiences of Clinical Care Delivery to Arbaeen Pilgrims in High-Density Conditions at Shalamcheh Border – A Qualitative Content Analysis
Source: Research Square preprint supplement (doi:10.21203/rs.3.rs-8173810/v1), 2025-12-25
Supplement: Supplementary file 1 [file 31a28289bf653fd8459fead7.docx]

**Semi-Structured Interview Guide (English Version)**

**This guide contains the open-ended questions used to conduct semi-structured interviews with nurses deployed at the Shalamcheh border during Arbaeen 1404.**

**Main Open-Ended Questions**

1. **Please describe your overall experience providing clinical care to Arbaeen pilgrims at the Shalamcheh border.**
2. **Can you walk me through a typical shift during peak hours in your unit (clinical, triage, or injection)?**
3. **What were the main challenges you faced in caring for pilgrims in such overcrowded and high-density conditions?**
4. **How did you manage communication and interaction with pilgrims from diverse linguistic and cultural backgrounds?**
5. **How did you deal with stress, fatigue, and limited resources during your deployment?**
6. **What structural or organizational issues (space, equipment, logistics, rest areas) affected care delivery?**
7. **What improvements do you think are needed to enhance care at the Shalamcheh border in future Arbaeen events?**
8. **How has participating in Arbaeen service influenced your professional growth or spiritual experience?**

**Probing Questions (used when needed)**

- **Can you give an example?**
- **What happened next?**
- **How did you handle that situation?**
- **What factors influenced your decision?**
- **How did this experience affect you professionally or personally?**
